# Supplementary material
Source: Research Square preprint supplement (doi:10.21203/rs.3.rs-9060982/v1)
Supplement: Supplementary file 1 [file a8d6cf92eae6325baa921970.docx]

**TOPIC: PREDICTORS OF FUNCTIONAL DECLINE AND ACTIVITY LIMITATIONS IN OLDER ADULTS IN ENUGU, SOUTHEAST NIGERIA**

Dear Respondent,

My name is Anna, a student of the Department of Medical Rehabilitation, College of Medicine, University of Nigeria, Enugu Campus. I would need your cooperation to answer this questionnaire on “**PREDICTORS OF FUNCTIONAL DECLINE AND ACTIVITY LIMITATIONS IN OLDER ADULTS IN ENUGU, SOUTHEAST NIGERIA ''.**

Be assured that information provided would be used strictly for academic purposes and confidentiality is fully assured. The questionnaire should take about 15 minutes to fill.

Questionnaire number: _______ Interview Date: ……………………

**SECTION A: SOCIODEMOGRAPHIC DATA**

1. Age of respondent (at last birthday)……………………

2. Marital Status a) Single [ ] b) Married [ ]

c) Divorced [ ] d) Widowed [ ]

3. Number of children a) 1 [ ] b) 2 [ ] c) 3 [ ] d) >3 [ ]

4. Religion a) Christian [ ] b)Muslim [ ] c) Traditional [ ] d) Others (specify)…...

5. Tribe a) Igbo [ ] b) Hausa [ ] c) Yoruba [ ] d) Others (specify)…

6. Your educational level a) None [ ] b) Primary [ ] c) Junior high/middle school [ ] d) Senior High/O-level/A-level [ ] e) Tertiary [ ]

7. Employment status a) Employed [ ] b) self-Employed [ ] c) Unemployed [ ]

8a. Family History of Diabetes a) Yes [ ] b) No [ ]

8. Previous History of Alcohol consumption a) Yes [ ] b) No [ ]

9. Current history of Alcohol consumption a) Yes [ ] b) No [ ]

10a. Previous History of smoking a) Yes [ ] b) No [ ]

10b. Current history of smoking a) Yes [ ] b) No [ ]

**SECTION B (6CIT)**

| **Question** | **Score range** | **Score** |
| --- | --- | --- |
| 1. What year is it? | **0-4**  **Correct - 0 points**  **Incorrect - 4 points** |  |
| 1. What month is it? | **0-3**  **Correct - 0 points**  **Incorrect - 3 points** |  |

Give the patient a phrase to remember with 5 components

e.g. John, Smith, 42, High start, Bedford

| 1. About what time is it?   (Within 1 hour) | **0-3**  **Correct - 0 points**  **Incorrect - 3 points** |  |
| --- | --- | --- |
| 1. Count backwards from 20 to 1 | **0-4**  **Correct – 0 points**  **1 error – 2 points**  **More than 1 error – 4 points** |  |
| 1. Say the months of the year in reverse | **0-4**  **Correct – 0 points**  **1 error – 2 points**  **More than 1 error – 4 points** |  |
| 1. Repeat the address phrase | **0-10**  **Correct – 0 points**  **1 error – 2 points**  **2 errors – 4 points**  **3 errors – 6 points**  **4 errors – 8 points**  **All wrong – 10 points** |  |

**Section C: Geriatric Depression Scale**

Instructions: Choose the best answer for how you felt over the past week

| S/N |  | **YES/NO** | **SCORE** |
| --- | --- | --- | --- |
| 1 | Are you basically satisfied with your life? |  |  |
| 2 | Have you dropped many of your activities and interests? |  |  |
| 3 | Do you feel that your life is empty? |  |  |
| 4 | Do you often get bored? |  |  |
| 5 | Are you in good spirits most of the time? |  |  |
| 6 | Are you afraid that something bad is going to happen to you? |  |  |
| 7 | Do you feel happy most of the time? |  |  |
| 8 | Do you often feel helpless? |  |  |
| 9 | Do you prefer to stay at home rather than going out and doing new things? |  |  |
| 10 | Do you feel you have more problems with memory than most people? |  |  |
| 11 | Do you think it is wonderful to be alive? |  |  |
| 12 | Do you feel pretty worthless the way you are now? |  |  |
| 13 | Do you feel full of energy? |  |  |
| 14 | Do you feel that your situation is hopeless?. |  |  |
| 15 | Do you think that most people are better off than you are? |  |  |

Scoring: score one point for each one selected. A score of 0 to 5 is normal. A score greater than 5 suggests depression.

### SECTION D: Pain Numeric Rating Scale

1. **On a scale of 0 to 10, with 0 being no pain at all and 10 being the worst pain imaginable, how would you rate your pain RIGHT NOW.**

| **0** | **1** | **2** | **3** | **4** | **5** | **6** | **7** | **8** | **9** | **10** |
| --- | --- | --- | --- | --- | --- | --- | --- | --- | --- | --- |
| **No** |  |  |  |  |  |  |  |  |  | **Worst Pain** |
| **Pain** |  |  |  |  |  |  |  |  |  | **Imaginable** |

1. **On the same scale, how would you rate your USUAL level of pain during the last week.**

| **0** | **1** | **2** | **3** | **4** | **5** | **6** | **7** | **8** | **9** | **10** |
| --- | --- | --- | --- | --- | --- | --- | --- | --- | --- | --- |
| **No** |  |  |  |  |  |  |  |  |  | **Worst Pain** |
| **Pain** |  |  |  |  |  |  |  |  |  | **Imaginable** |

1. **On the same scale, how would you rate your BEST level of pain during the last week.**

| **0** | **1** | **2** | **3** | **4** | **5** | **6** | **7** | **8** | **9** | **10** |
| --- | --- | --- | --- | --- | --- | --- | --- | --- | --- | --- |
| **No** |  |  |  |  |  |  |  |  |  | **Worst Pain** |
| **Pain** |  |  |  |  |  |  |  |  |  | **Imaginable** |

1. **On the same scale, how would you rate your WORST level of pain during the last week.**

| **0** | **1** | **2** | **3** | **4** | **5** | **6** | **7** | **8** | **9** | **10** |
| --- | --- | --- | --- | --- | --- | --- | --- | --- | --- | --- |
| **No** |  |  |  |  |  |  |  |  |  | **Worst Pain** |
| **Pain** |  |  |  |  |  |  |  |  |  | **Imaginable** |

**SECTION E: CONFUSION ASSESSMENT METHOD**

**Acute Onset**

1. Is there evidence of an acute change in mental status from the patient’s baseline?

YES NO UNCERTAIN NOT APPLICABLE


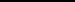

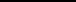

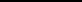

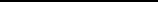

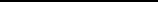

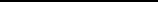

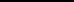

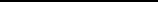


**Inattention**

2. Does the patient have difficulty focusing attention?

YES NO UNCERTAIN NOT APPLICABLE


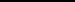

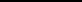

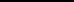

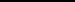


(*If present or abnormal*) Please describe this behavior.


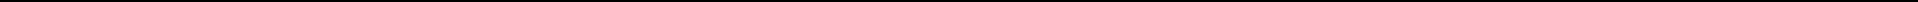

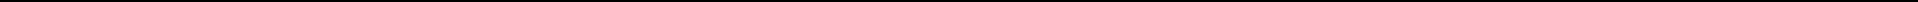


**Disorganized Thinking**

1. Was the patient’s thinking disorganized or incoherent, such as rambling or irrelevant conversation, unclear or illogical flow of ideas, or unpredictable, switching from subject to subject?

YES NO UNCERTAIN NOT APPLICABLE


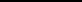

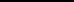

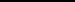

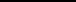


**Altered Level of Consciousness**

1. Overall, how would you rate this patient’s level of consciousness? Alert (*normal*)

Vigilant (*hyperalert, overly sensitive to environmental stimuli, startled very easily*) Lethargic (*drowsy, easily aroused*)

Stupor (*difficult to arouse*) Coma (*unarousable*) Uncertain

**Disorientation**

1. Was the patient disoriented at any time during the interview, such as thinking that he or she was somewhere other than the hospital, using the wrong bed, or misjudging the time of day?

YES NO UNCERTAIN NOT APPLICABLE


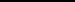

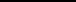

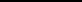

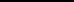


**Memory Impairment**

1. Did the patient demonstrate any memory problems during the interview, such as inability to remember events in the hospital or difficulty remembering instructions?

YES NO UNCERTAIN NOT APPLICABLE


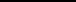

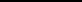

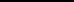

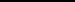


**Perceptual Disturbances**

1. Did the patient have any evidence of perceptual disturbances, such as hallucinations, illusions, or misinterpretations (for example, thinking something was moving when it was not)?

YES NO UNCERTAIN NOT APPLICABLE


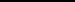

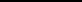

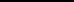

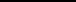


**Psychomotor Agitation**

8A. At any time during the interview, did the patient have an unusually increased level of motor activity, such as restlessness, picking at bedclothes, tapping fingers, or making frequent, sudden changes in position?

YES NO UNCERTAIN NOT APPLICABLE


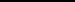

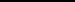

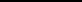

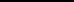


**Psychomotor Retardation**

8B. At any time during the interview, did the patient have an unusually decreased level of motor activity, such as sluggishness, staring into space, staying in one position for a long time, or moving very slowly?

YES NO UNCERTAIN NOT APPLICABLE


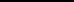

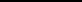

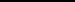

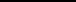


**Altered Sleep-Wake Cycle**

1. Did the patient have evidence of disturbance of the sleep-wake cycle, such as excessive daytime sleepiness with insomnia at night?

YES NO UNCERTAIN NOT APPLICABLE


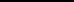

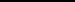

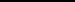

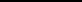


***Scoring:***

For a diagnosis of delirium by CAM, the patient must display:

1. Presence of acute onset and fluctuating discourse

AND

1. Inattention

AND EITHER

1. Disorganized thinking

OR

1. Altered level of consciousness

SECTION F: **Katz Index of Independence in ADL**

| **Activities**  **Point 1 or 0** | **Independence**  **(1 point)**  **No supervision, direction or personal assistance** | **Dependence**  **(0 points)**  **WITH supervision, direction, personal assistance or total care.** |
| --- | --- | --- |
| **BATHING**  **Points: ________** | **(1 POINT) Bathes self completely or needs help in bathing only a single part of the body such as the back, genital area or disabled extremity.** | **(0 POINTS) Need help with bathing more than one part of the body, getting in or out of the tub or shower. Requires total bathing** |
| **DRESSING**  **Points: ________** | (1 POINT) Get clothes from closets and drawers and puts on clothes and outer garments complete with fasteners.  May have help tying shoes. | (0 POINTS) Needs help with dressing self or needs to be completely dressed. |
| **TOILETING**  **Points: ________** | **(1 POINT) Goes to toilet, gets on and off, arranges clothes, cleans genital area without help.** | **(0 POINTS) Needs help transferring to the toilet, cleaning self or uses bedpan or commode.** |
| **TRANSFERRING**  **Points: ________** | (1 POINT) Moves in and out of bed or chair unassisted. Mechanical transfer aids are acceptable | (0 POINTS) Needs help in moving from bed to chair or require a complete transfer |
| **CONTINENCE**  **Points: ________** | (1 POINT) Exercises complete self control over urination and defecation. | (0 POINTS) Is partially or totally incontinent of bowel or bladder |
| **FEEDING**  **Points: ________** | (1 POINT) Gets food from plate into mouth without help. Preparation of food may be done by another person. . | (0 POINTS) Needs partial or total help with feeding or requires parenteral feeding |
| **TOTAL POINTS: ________**  **SCORING: 6 = High (patient independent) 0 = Low (patient very dependent** | | |
